# Supplementary material for: FOXA1 regulates androgen receptor variant activity in models of castrate-resistant prostate cancer
Source: PubMed Central journal article supplement (PMC4745762; doi:10.18632/oncotarget.4927), 2015-08-13
Supplement: oncotarget-06-29782-s001.pdf [file oncotarget-06-29782-s001.pdf]

## SUPPLEMENTARY DATA

### REFERENCES

1. Hu R, Lu C, Mostaghel EA, Yegnasubramanian S, Gurel M, Tannahill C, Edwards J, Isaacs WB, Nelson PS, Bluemn E, Plymate SR, Luo J. Distinct transcriptional programs mediated by the ligand-dependent full-length androgen receptor and its splice variants in castration-resistant prostate cancer. *Cancer Res.* 2012; 72:3457–3462.
2. Lu J, Lonergan PE, Nacusi LP, Wang L, Schmidt LJ, Sun Z, Van der Steen T, Boorjian SA, Kosari F, Vasmatazis G, Klee GG, Balk SP, Huang H, Wang C, Tindall DJ. The cisrome and gene signature of androgen receptor splice variants in castration resistant prostate cancer cells. *J Urol.* 2015; 193:690–698.

## SUPPLEMENTARY FIGURES AND TABLES

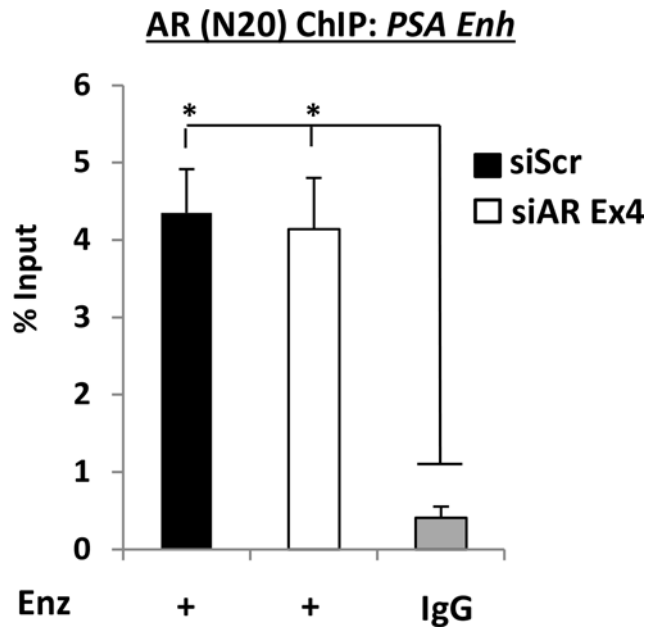

**Supplementary Figure S1:** CWR22Rv1 cells were transiently transfected with either scrambled (siScr) or FL-AR-targeting Exon 4 siRNAs for 48 hours prior to 24 hour Enzalutamide treatment and ChIP analysis using AR N20 and control antibodies. Enrichment of AR-Vs was assessed at the enhancer element of the *PSA* gene. Data represents the mean of three independent experiments  $\pm$  SE (\* denotes  $p$ -value  $< 0.05$ ).

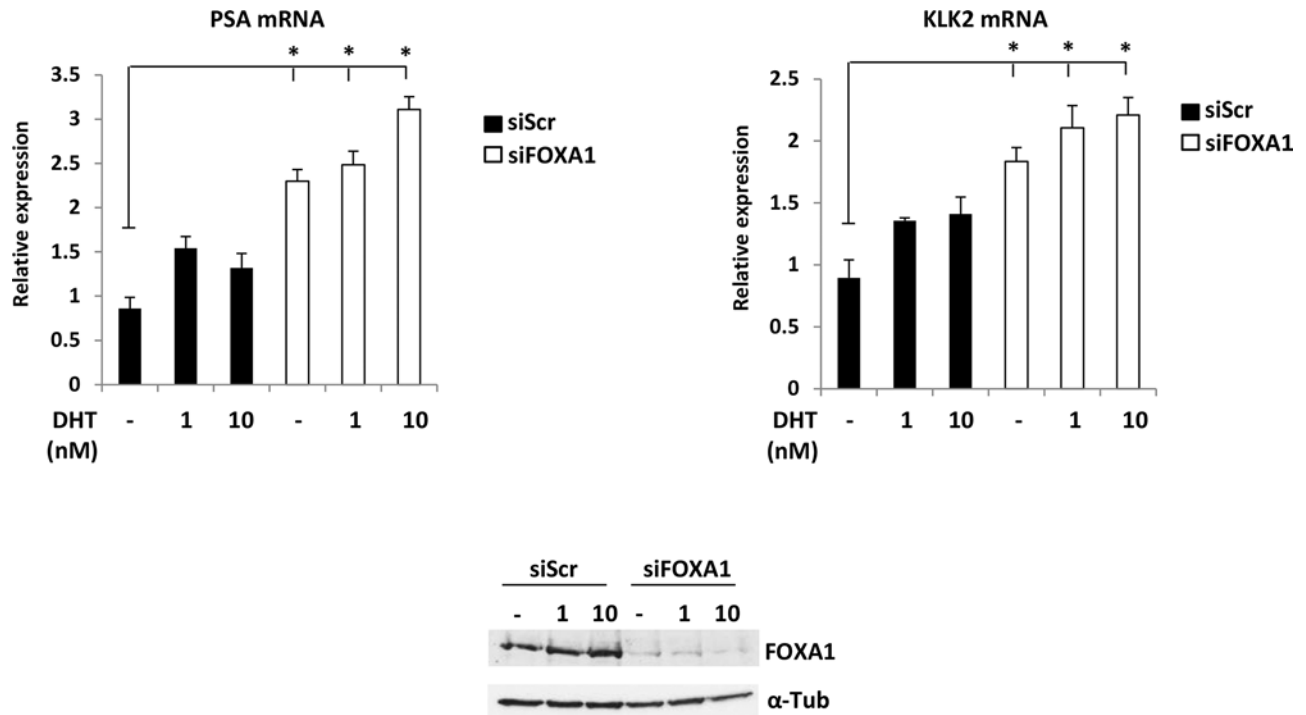

**Supplementary Figure S2:** CWR22Rv1 cells depleted of FOXA1 by siRNA for 24 hours were treated with either 1 or 10 nM dihydrotestosterone (DHT) for an additional 24 hours prior to RNA extraction and quantitative analysis of *PSA* and *KLK2* expression. Immunoblotting confirmed depletion of FOXA1 by siRNA. Data represents the mean of three independent experiments  $\pm$  SE (\* denotes  $p$ -value  $< 0.05$ ).

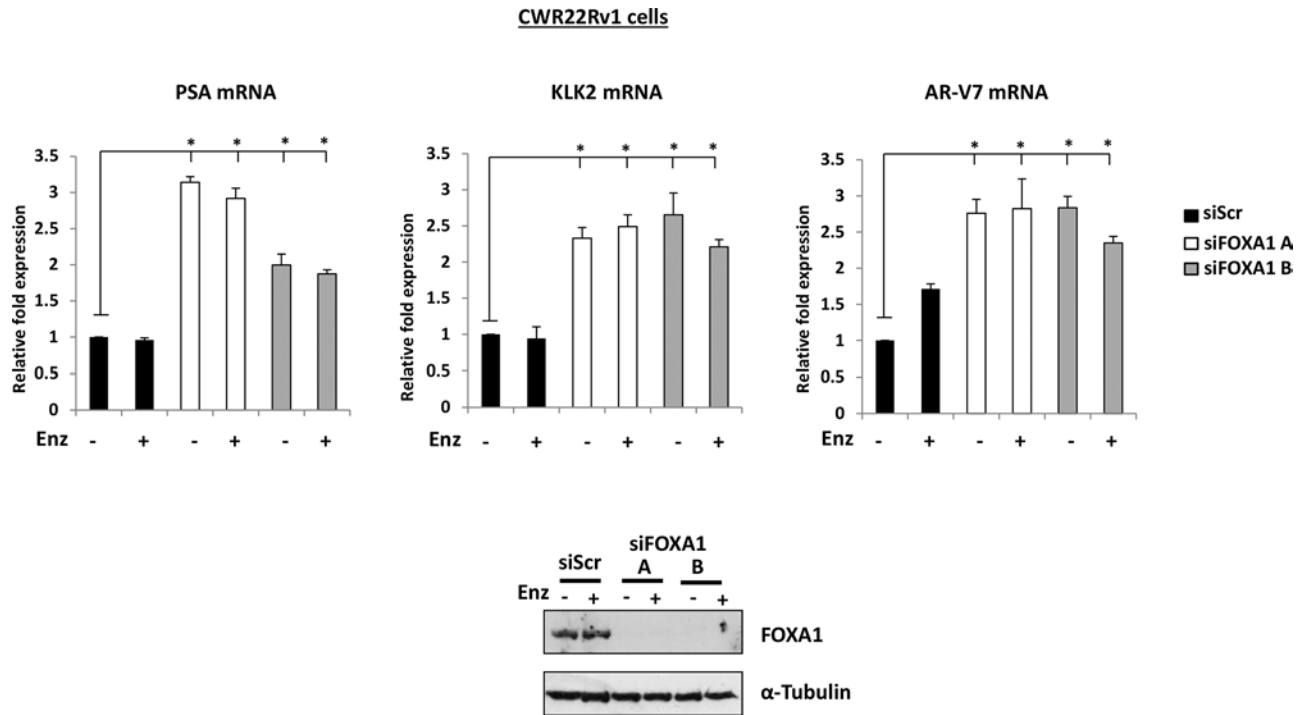

**Supplementary Figure S3:** FOXA1 was depleted by two individual siRNAs (siFOXA1 A. and B.) for 48 hours in CWR22Rv1 cells and levels of PSA, KLK2 and AR-V7 mRNA were measured after 24 hours 1  $\mu$ M Enzalutamide treatment by quantitative PCR. Representative westerns of FOXA1 are shown in the lower panel. Data represents the mean of three independent experiments  $\pm$  SE (\* denotes  $p$ -value  $< 0.05$ ).

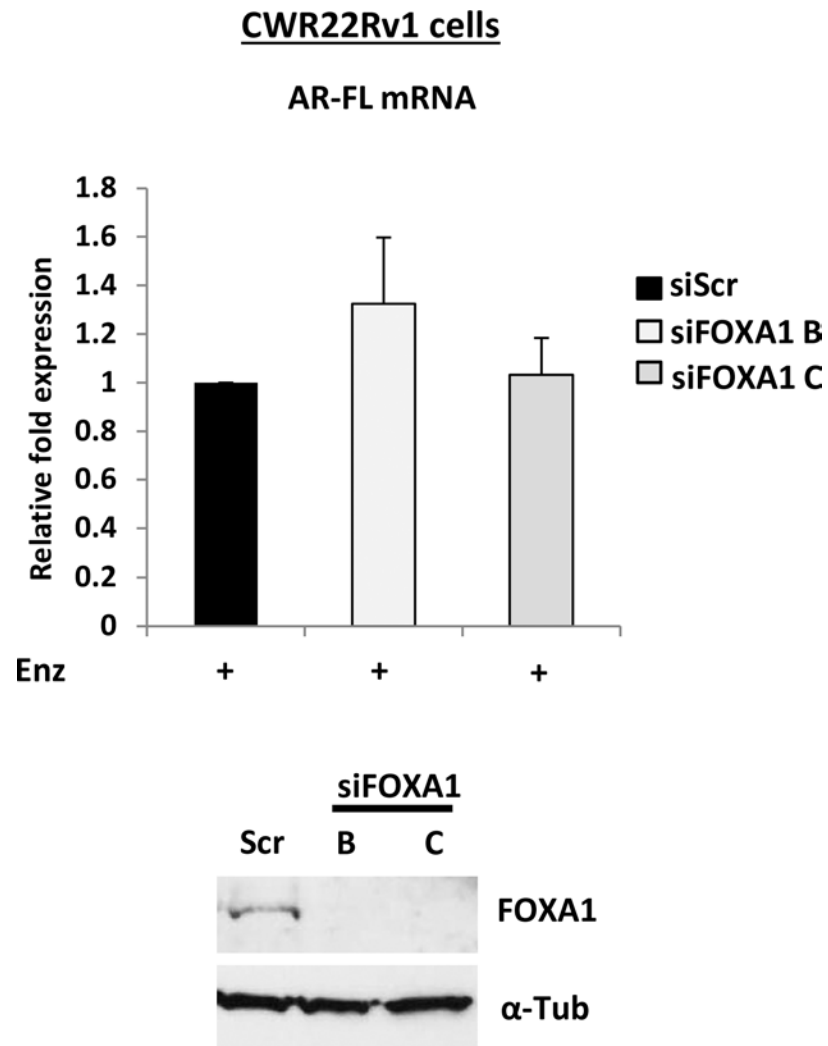

**Supplementary Figure S4:** FOXA1 knockdown in CWR22Rv1 cells was performed using two additional oligonucleotides (B and C) for 48 hours prior to 24 hour Enzalutamide treatment and RNA extraction. Full-length AR (AR-FL) expression was analysed by quantitative PCR. Data represents the mean of three independent experiments  $\pm$  SE (\* denotes  $p$ -value < 0.05). Representative western blots to confirm FOXA1 depletion is shown.

A.

VCaP cells

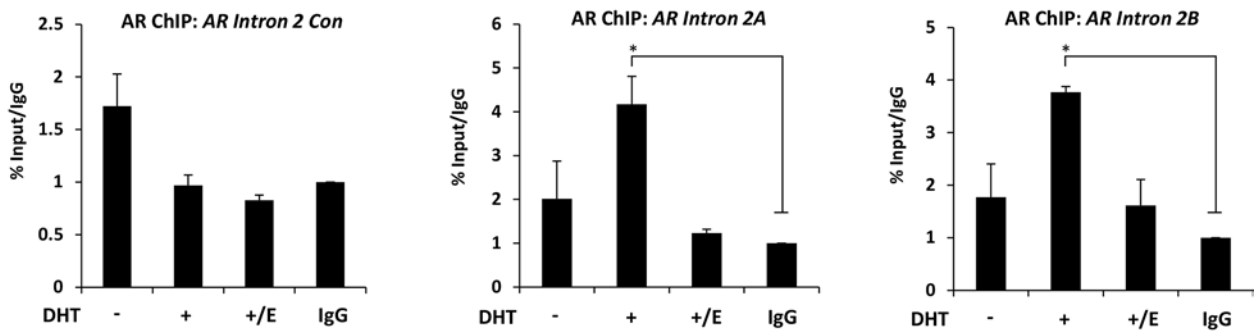

B.

VCaP cells

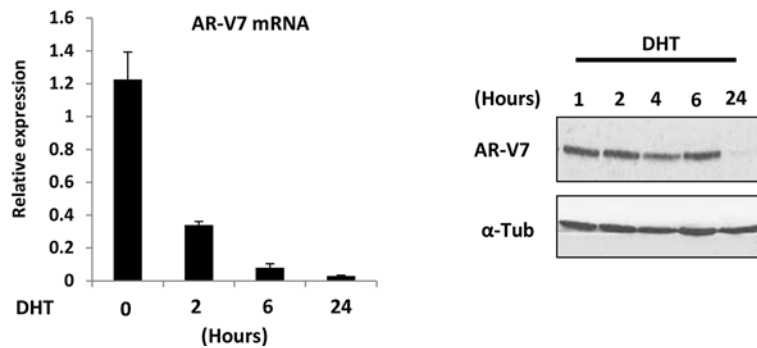

**Supplementary Figure S5:** **A.** Chromatin immunoprecipitation (ChIP) was performed using an AR (N20) antibody in VCaP cells grown in steroid-depleted media and treated with 10 nM DHT and/or 1  $\mu$ M Enzalutamide for 4 hours to assess AR recruitment to the *AR* gene DRE. **B.** VCaP cells were grown in steroid-depleted media for 48 hours and then treated with 10 nM DHT for 0–24 hours prior to western analysis using anti-AR and - $\alpha$ -Tubulin antibodies. Data represents the mean of three independent experiments  $\pm$  SE (\* denotes  $p$ -value  $<$  0.05).

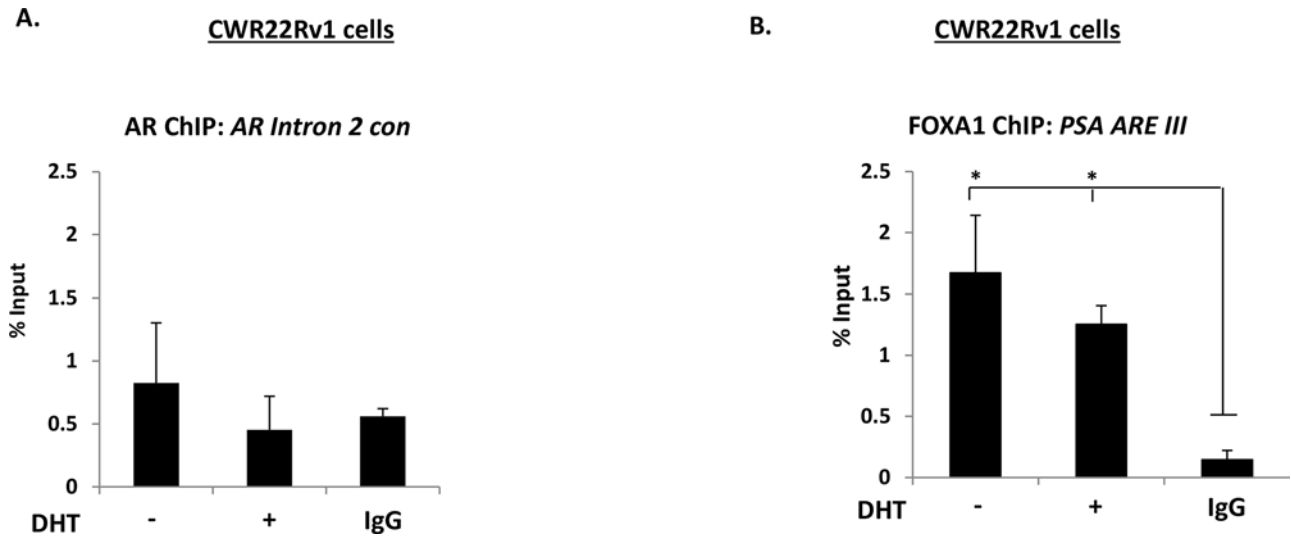

**Supplementary Figure S6: A.** Chromatin immunoprecipitation (ChIP) experiments in CWR22Rv1 cells using an AR (N20) antibody to assess recruitment of AR-Vs to a control region adjacent to intron 2 of the *AR* gene in response to 4 hour 10 nM DHT treatment. **B.** As in (A), but ChIP was conducted using an anti-FOXA1 antibody to assess recruitment of FOXA1 to the enhancer element of the *PSA* gene. Data represents the mean of three independent experiments  $\pm$  SE (\* denotes  $p$ -value  $< 0.05$ ).

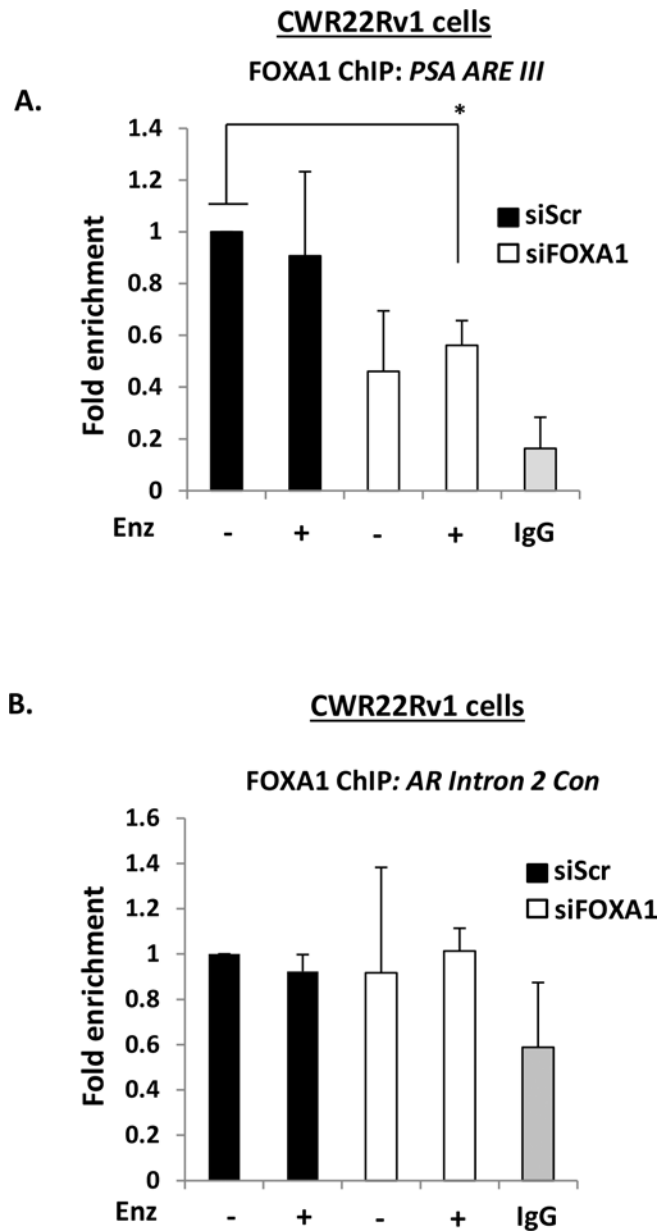

**Supplementary Figure S7:** CWR22Rv1 cells depleted of FOXA1 were treated with Enzalutamide for 4 hours and subject to ChIP using an anti-FOXA1 antibody to assess recruitment to either **A.** the *PSA* gene enhancer or **B.** a control region adjacent to intron 2 of the *AR* gene. Data represents the mean of three independent experiments  $\pm$  SE (\* denotes  $p$ -value  $< 0.05$ ).



## Annotated genes (p= <0.05)

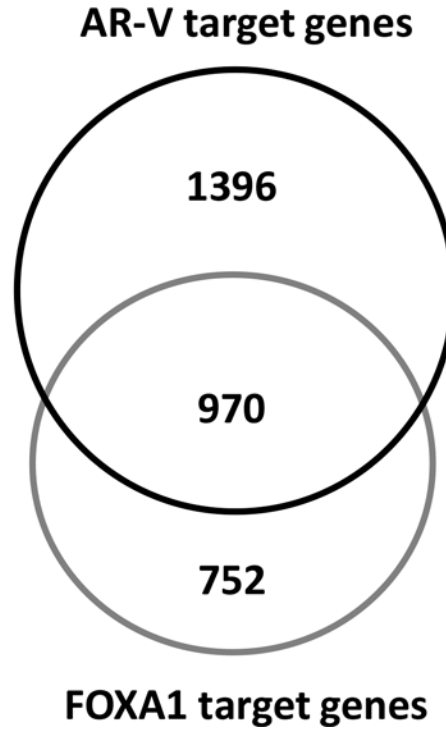

**Supplementary Figure S8:** Venn diagram of significantly de-regulated genes in response to AR and FOXA1 depletion in CWR22Rv1 cells grown in steroid-depleted conditions + 1  $\mu$ M Enzalutamide.

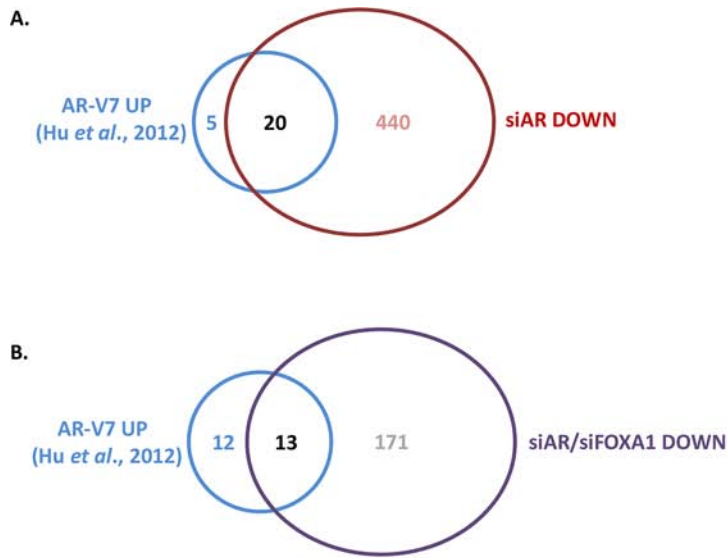

**C.**

**Overlapping AR-V7 UP genes**

| Gene: siAR DOWN | Gene: siAR/siFOXA1 DOWN |
|-----------------|-------------------------|
| <i>BIRC5</i>    | <i>BIRC5</i>            |
| <i>BUB1</i>     | <i>BUB1</i>             |
| <i>KPNA2</i>    | <i>KPNA2</i>            |
| <i>CENPE</i>    | <i>CENPE</i>            |
| <i>ESPL1</i>    | <i>ESPL1</i>            |
| <i>NEK2</i>     | <i>NEK2</i>             |
| <i>CIT</i>      | <i>CIT</i>              |
| <i>CCNA2</i>    | <i>CCNA2</i>            |
| <i>CDC25C</i>   | <i>CDC25C</i>           |
| <i>KIF15</i>    | <i>KIF15</i>            |
| <i>UBE2C</i>    | <i>UBE2C</i>            |
| <i>NUSAP1</i>   | <i>NUSAP1</i>           |
| <i>BIRC5</i>    | <i>BIRC5</i>            |
| <i>CDCA5</i>    |                         |
| <i>KNTC1</i>    |                         |
| <i>BUB1B</i>    |                         |
| <i>CDC25B</i>   |                         |
| <i>MAD2L2</i>   |                         |
| <i>KIF22</i>    |                         |
| <i>MAD2L1</i>   |                         |

**Supplementary Figure S9:** Venn diagrams showing overlap between the AR-V7 UP signature (Hu et al.,2012 (1)) and either our AR-V target gene-set **A.** or joint AR-V/FOXA1-regulated gene-set **B.** **C.** Table of overlapping genes shown in (A) and (B).

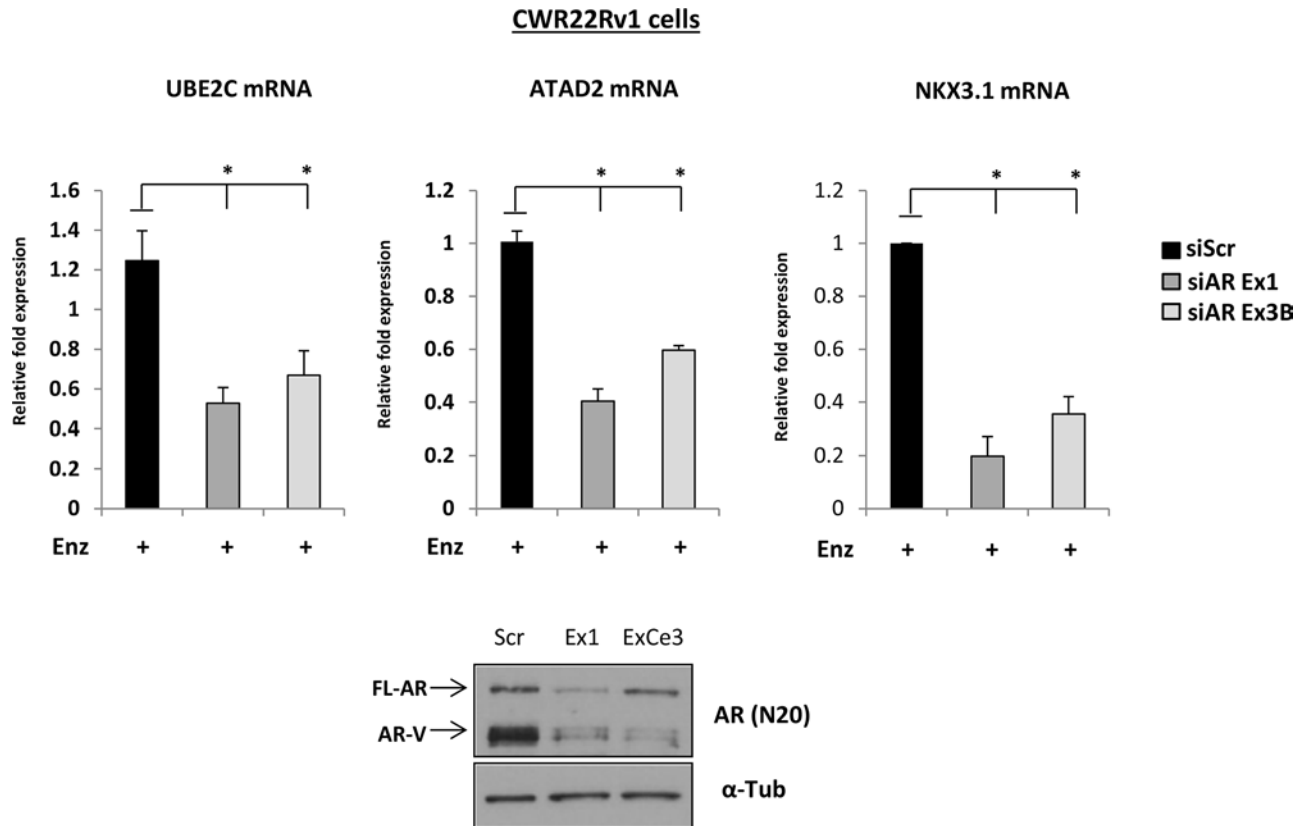

**Supplementary Figure S10:** CWR22RV1 cells were transiently transfected with either control (siScr), AR Exon 1-targeting or AR Exon 3B-targeting siRNAs to deplete all or AR-Vs, respectively, for 48 hours prior to 24 hour Enzalutamide treatment and RNA extraction. *UBE2C*, *ATAD2* and *NKX3.1* expression was analysed by quantitative PCR. Data represents the mean of three independent experiments +/- SE (\* denotes  $p$ -value < 0.05). Representative western blots are shown to demonstrate selective depletion of AR species.

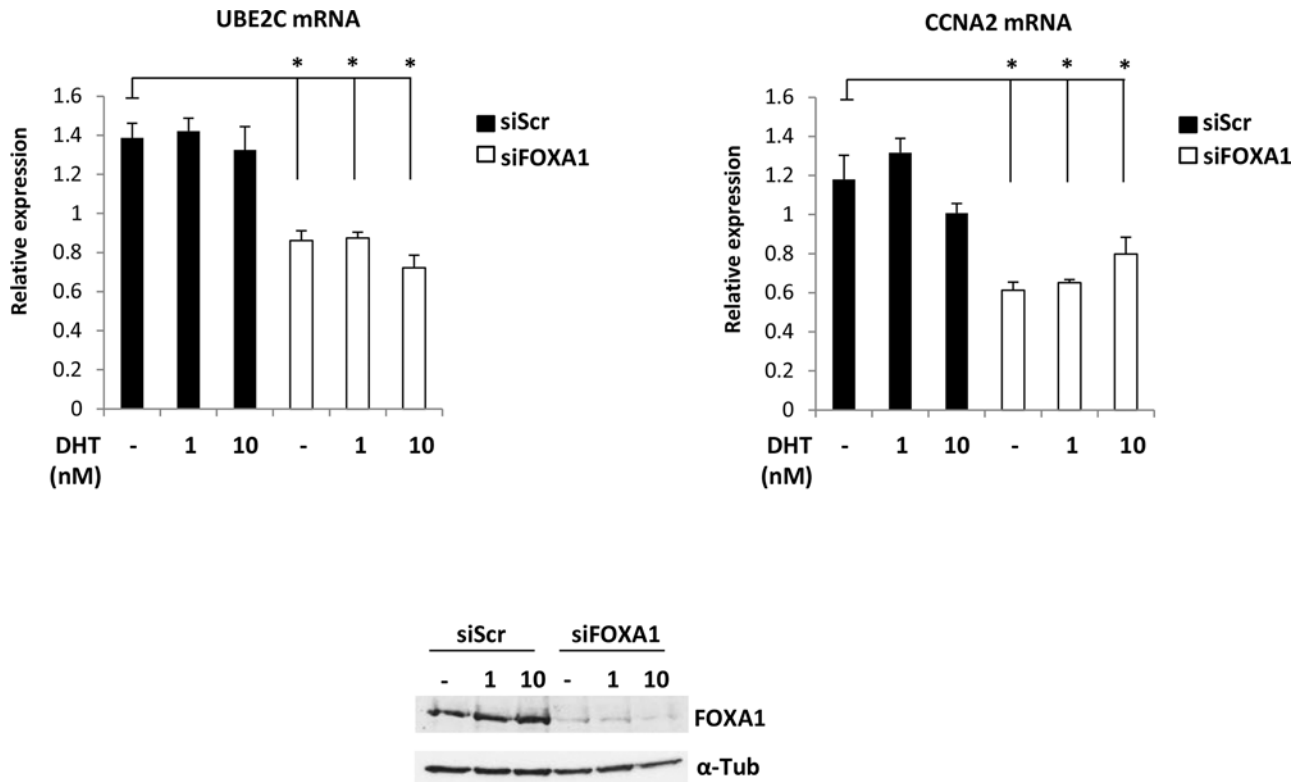

**Supplementary Figure S11:** CWR22Rv1 cells depleted of FOXA1 by siRNA for 24 hours were treated with either 1 or 10 nM dihydrotestosterone (DHT) for an additional 24 hours prior to RNA extraction and quantitative analysis of *UBE2C* and *CCNA2* expression. Immunoblotting confirmed depletion of FOXA1 by siRNA. Data represents the mean of three independent experiments  $\pm$  SE (\* denotes  $p$ -value  $< 0.05$ ).

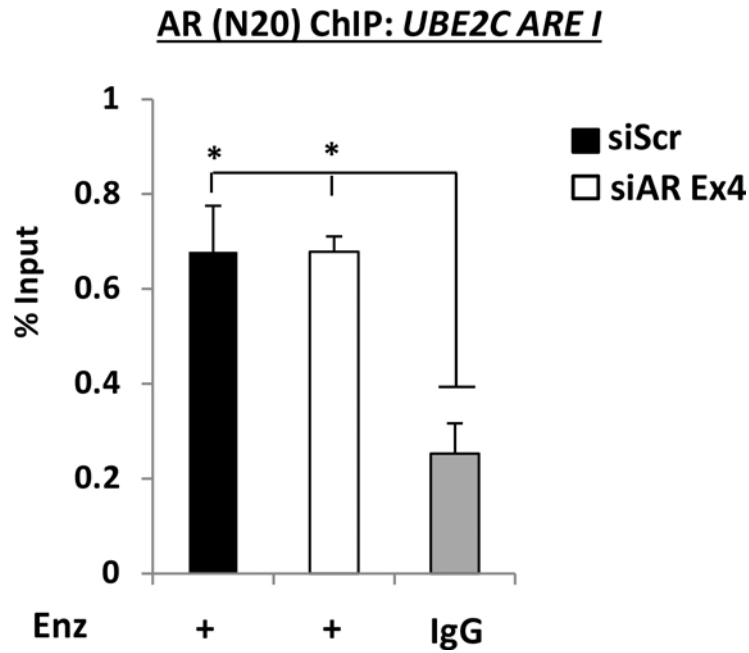

**Supplementary Figure S12:** CWR22RV1 cells depleted of AR-FL by AR Exon 4-targeting siRNAs for 48 hours prior to 24 hour Enzalutamide treatment were subject to chromatin immunoprecipitation using AR N20 and control antibodies. Enrichment of AR-Vs to the cis-regulatory element of *UBE2C* was assessed by quantitative PCR. Data represents the mean of three independent experiments +/- SE (\* denotes  $p$ -value < 0.05).

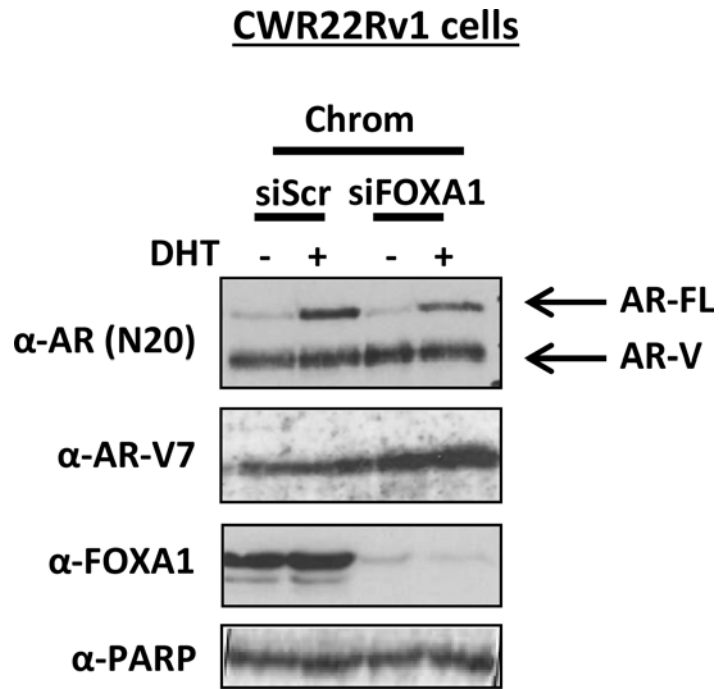

**Supplementary Figure S13:** CWR22Rv1 cells depleted of FOXA1 were treated with 10 nM DHT for 4 hours prior to chromatin fractionation and western blotting using anti-AR, -AR-V7, -FOXA1 and -PARP1 antibodies.

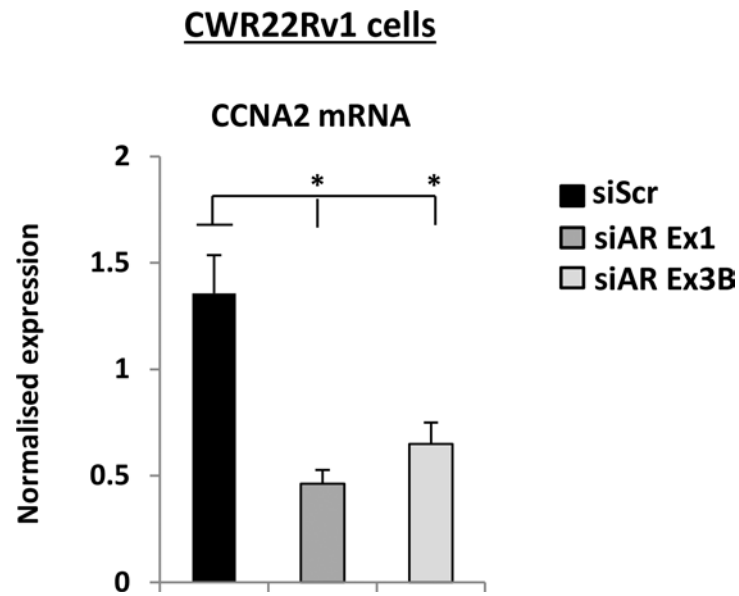

**Supplementary Figure S14:** CWR22RV1 cells were transiently transfected with either control (siScr), AR Exon 1-targeting or AR Exon 3B-targeting siRNAs to deplete all or AR-Vs, respectively, for 48 hours prior to 24 hour Enzalutamide treatment and RNA extraction. CCNA2 expression was analysed by quantitative PCR. Data represents the mean of three independent experiments  $\pm$  SE (\* denotes  $p$ -value  $< 0.05$ ).

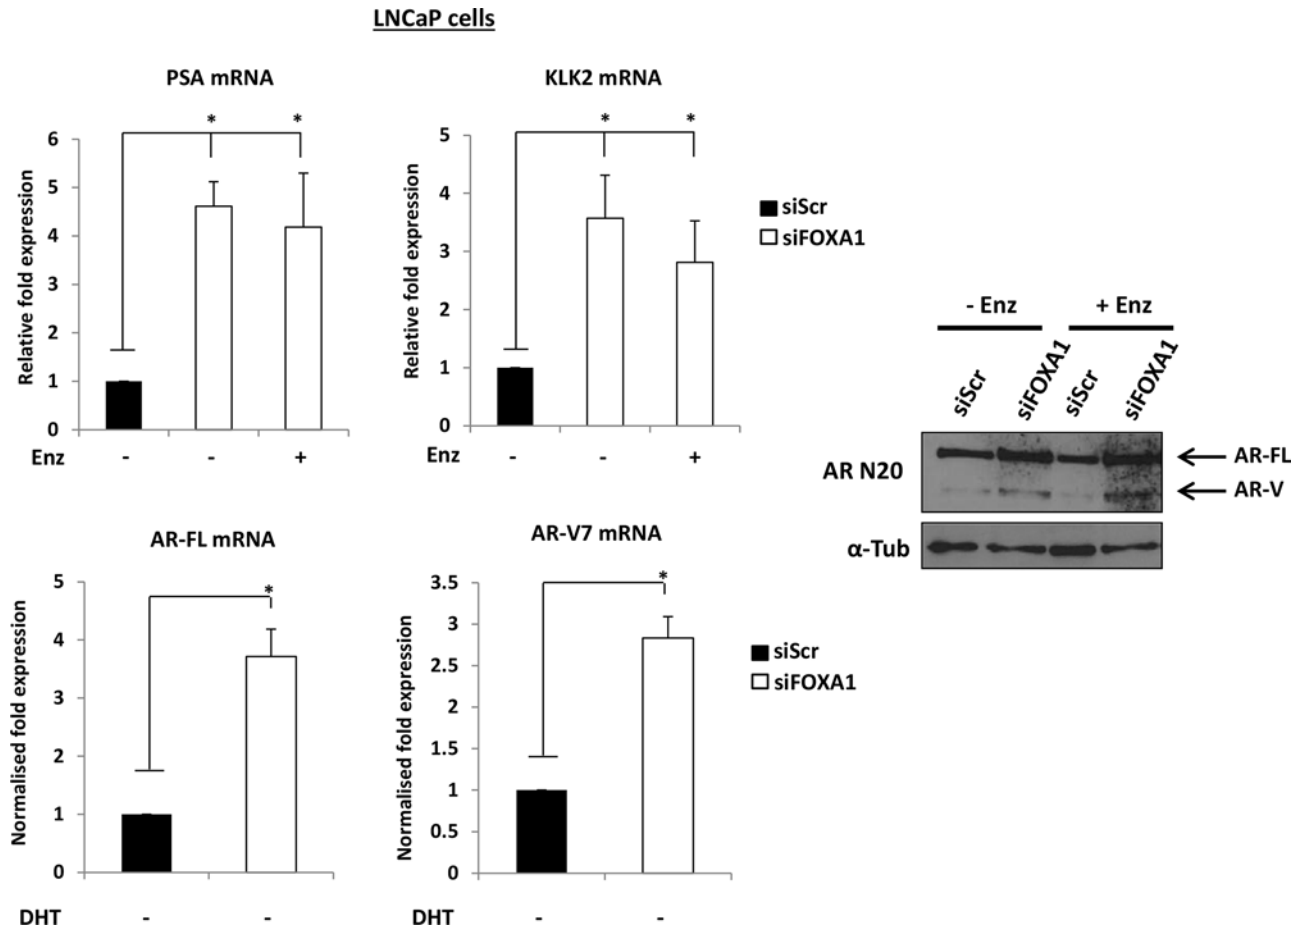

**Supplementary Figure S15:** FOXA1 levels were reduced by siRNA knockdown for 48 hours in LNCaP cells and mRNA levels of PSA, KLK2, FL-AR and AR-V7 was measured after 24 hours 10 nM DHT or 1  $\mu$ M Enzalutamide stimulation by quantitative PCR. Representative western blots using anti-AR and  $\alpha$ -Tubulin antibodies is shown. Data represents the mean of three independent experiments  $\pm$  SE (\* denotes  $p$ -value < 0.05).



**Supplementary Table S1: List of AR-V target genes**

**Supplementary Table S2: List of FOXA1 target genes**

**Supplementary Table S3: Overlapping AR-V-target genes with Lu *et al.*, (2015)(2)**

| Gene    |         |        |         |          |
|---------|---------|--------|---------|----------|
| ABTB1   | DNAJC12 | HSPB6  | MT1G    | SELENBP1 |
| ACADVL  | DYNLT3  | ICAM3  | MT2A    | SFXN1    |
| ACOT7   | EFNB2   | IGFBP3 | NFKBIZ  | SLC40A1  |
| ACPP    | EFNB3   | IMMP2L | PLA2G3  | SLCO2A1  |
| ADD3    | FHDC1   | ING2   | PMEPA1  | SNORD68  |
| APPL2   | FSCN1   | LAMB2  | PPP2R2A | TAX1BP1  |
| ARMCX3  | G3BP2   | LEF1   | PRELID1 | TSPAN3   |
| ATP5I   | GADD45A | LXN    | RAB11A  | ZNF789   |
| BAMBI   | GALNT4  | MICAL1 | RAB9A   | ZSWIM4   |
| BOLA3   | GLDN    | MKNK2  | RNY4    |          |
| CCNDBP1 | GNG4    | MT1A   | RPL34   |          |
| CCNG2   | GPC4    | MT1E   | SDC4    |          |

**Supplementary Table S4: Overlapping AR-V/FOXA1-target genes with Lu *et al.*, (2015)(2)**

| Gene    |        |          |
|---------|--------|----------|
| ABTB1   | GPC4   | MT1G     |
| ACADVL  | IGFBP1 | NFKBIZ   |
| ATP5I   | IGFBP3 | PLA2G3   |
| BOLA3   | ING2   | RNY4     |
| CCNDBP1 | LAMB2  | RPL34    |
| EFNB2   | LEF1   | SDC4     |
| FSCN1   | LXN    | SELENBP1 |
| G3BP2   | MKNK2  | SFXN1    |
| GNG4    | MT1A   | SLCO2A1  |
|         |        | TSPAN3   |

**Supplementary Table S5: Primer and siRNA sequences**

| Oligo Name         | Sequence (5'-3')         |
|--------------------|--------------------------|
| siFOXA1 A          | GAGAGAAAAAAUCAACAGC      |
| siFOXA1 B          | GCACUGCAAUACUCGCCUU      |
| siAR               | CCAUCUUUCUGAAUGUCCU      |
| FOXA1 mRNA F       | GAAGATGGAAGGGCATGAAACCA  |
| FOXA1 mRNA R       | TGGCATAGGACATGTTGAAGGACG |
| FL-AR mRNA F       | CATGTGGAAGCTGCAAGGTCT    |
| FL-AR mRNA R       | TCTGTTCCCTTCAGCGGC       |
| AR exon 3 F mRNA   | AACAGAAGTACCTGTGCGCC     |
| AR-V7 R mRNA       | TCAGGGTCTGGTCATTTTGA     |
| AR-1/2/3/2b R mRNA | GTTTATTCTGAAAAATCCTTCAGC |
| PSA F mRNA         | GGTGCATTACCGGAAGTGGAT    |
| PSA R mRNA         | TGGTCATTTCCAAGGTTCCAA    |
| KLK2 F mRNA        | AGCATCGAACCAGAGGAGTTCT   |
| KLK2 R mRNA        | TGGAGGCTCACACACCTGAAGA   |

| Oligo Name         | Sequence (5'-3')          |
|--------------------|---------------------------|
| UBE2C mRNA F       | TGCCCTGTATGATGTCAGGA      |
| UBE2C mRNA R       | GGGACTATCAATGTTGGGTTCT    |
| NKX3.1 mRNA F      | AGCCAGAAAGGCACTTGGG       |
| NKX3.1 mRNA R      | GGCGCCTGAAGTGTTTTCA       |
| CCNA2 mRNA F       | GAAGACGAGACGGGTTGCA       |
| CCNA2 mRNA R       | AGGAGGAACGGTGACATGCT      |
| PSA Enh ChIP F     | TGGGACAACCTTGCAAACCTG     |
| PSA Enh ChIP R     | CCAGAGTAGGTCTGTTTTCAATCCA |
| TMPRSS2 FAIRE F    | TGGTCCTGGATGATAAAAAAGTTT  |
| TMPRSS2 FAIRE R    | GACATACGCCCCACAACAGA      |
| UBE2C ARE I ChIP F | TGCCTCTGAGTAGGAACAGGTAAGT |
| UBE2C ARE I ChIP R | TGCTTTTTCCATCATGGCAG      |
| UBE2C ARE 2 ChIP F | CCACAAACTCTTCTCAGCTGGG    |
| UBE2C ARE 2 ChIP R | TTCTTTCCTTCCCTGTTACCCC    |

| Oligo Name           | Sequence (5'-3')              |
|----------------------|-------------------------------|
| CCNA2 ChIP F         | TTAGTGAGCTGTCCAGTGA CTCAAT    |
| CCNA2 ChIP R         | CCCATGTATTAAAGTAGCTTCTGTAAACA |
| AR Exon 2 Con ChIP F | GTGCTGTACAGGAGCCGAAG          |
| AR Exon 2 Con ChIP R | AACTTCACCGAAGAGGAAAGG         |
| AR Exon 2 2A ChIP F  | CCATCATGTGCATTATGTGC          |
| AR Exon 2 2A ChIP R  | CCAAACAGCACTCCATGTGT          |
| AR Exon 2 2B ChIP F  | CACATGGAGTGCTGTTTGGT          |
| AR Exon 2 2B ChIP R  | GTAAACATCAGTGAGGATGGTG        |
